# Supplementary material
Source: PubMed Central journal article supplement (PMC2582319)
Supplement: 0802781105_0802781105SI.pdf [file 0802781105_0802781105SI.pdf]

# Supporting Information

Guenther et al. 10.1073/pnas.0802781105

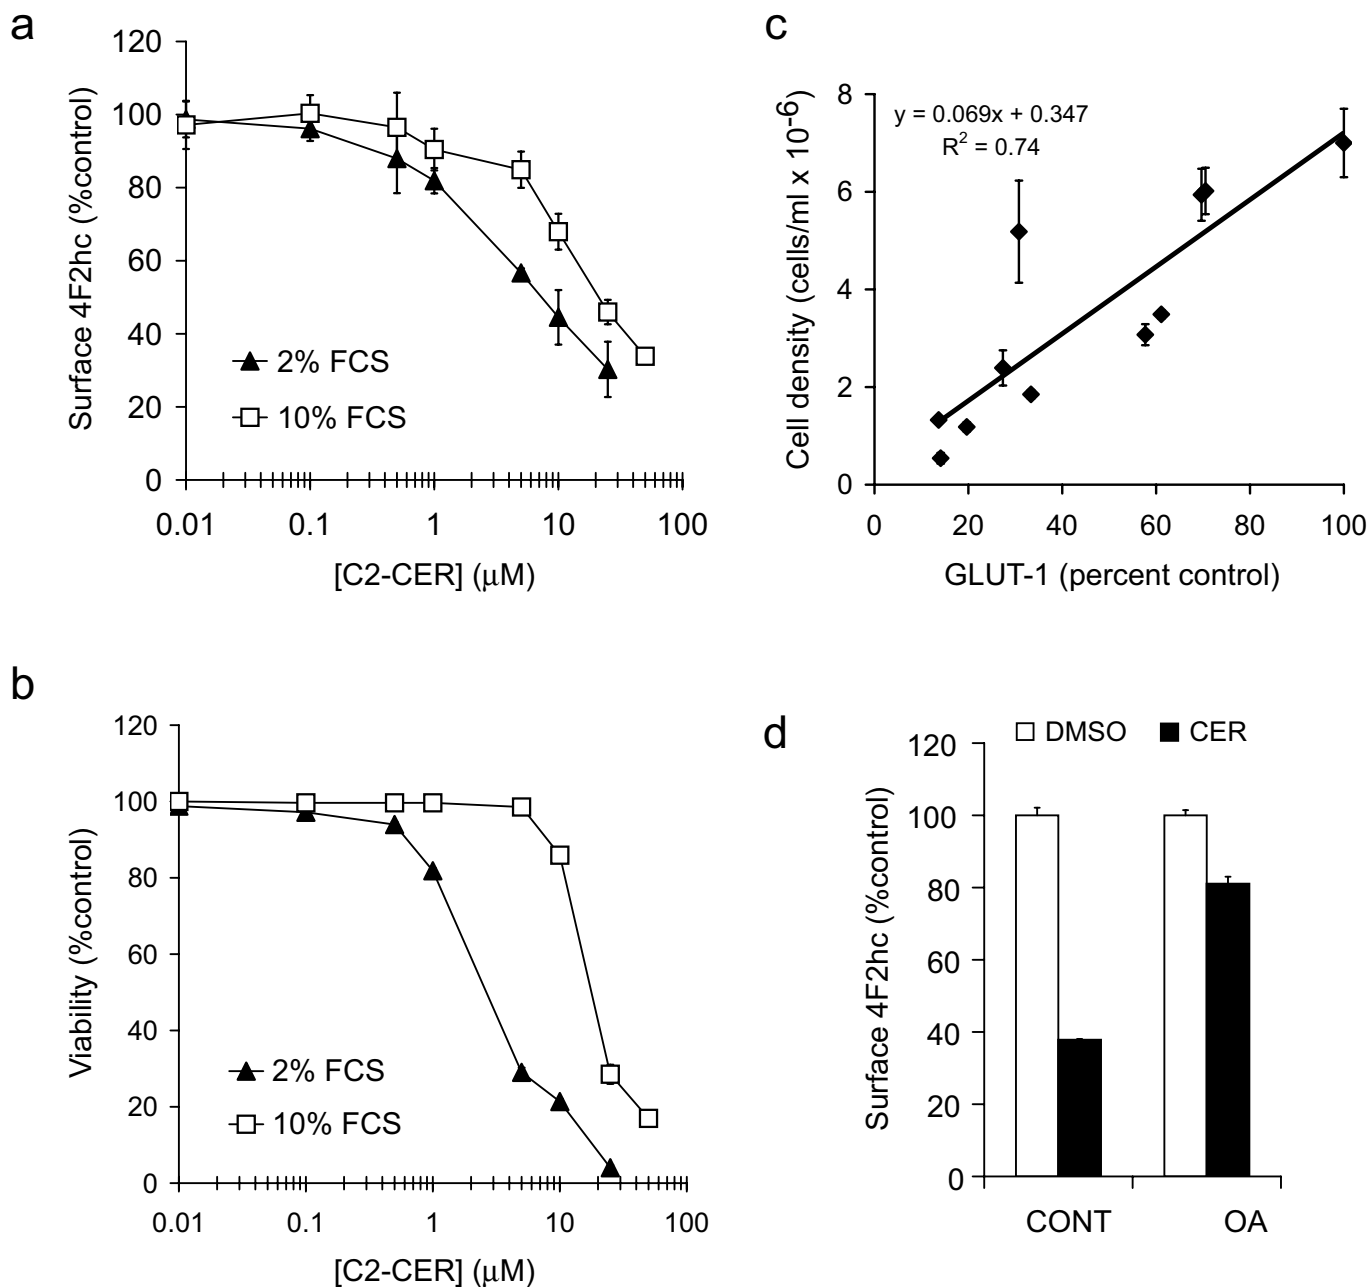

**Fig. S1.** Ceramide induces intracellular nutrient stress by causing nutrient transporter protein downregulation. (a) Surface expression of 4F2hc was evaluated by flow cytometry 8 h after FL5.12 cells were treated with C2-cer in media containing either 2% or 10% FCS. Error bars, SD. (b) Viability of the cells in a was determined at 24 h. Error bars, SD. (c) Independent FL5.12 clonal lines stably expressing one of four different shRNA targeting GLUT-1 were plated at 25,000 cells/ml and cell density was measured 4 days later (error bars, SEM). GLUT-1 expression level was quantified by Western blot using an Odyssey Infrared Imaging System. (d) FL5.12 cells were treated with DMSO or 50  $\mu\text{M}$  C2-cer in the presence or absence of 1  $\mu\text{M}$  okadaic acid (OA) and 4F2hc expression measured at 4 h. Error bars, SD.



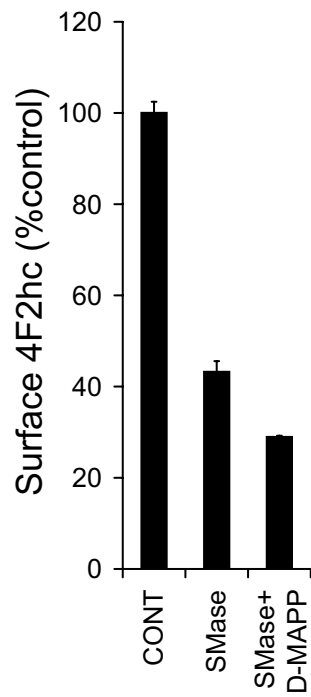

**Fig. S3.** Ceramide produced from sphingomyelin degradation causes nutrient transporter downregulation. Surface expression of 4F2hc by flow cytometry in cells left untreated (CONT) or incubated for 2 h with 1 U/ml of bacterial SMase in the presence or absence of 10  $\mu$ M D-MAPP. Error bars, SD.
